# Supplementary material
Source: ML conference proceedings conference paper supplement (https://openaccess.thecvf.com/content/CVPR2024/html/Zhao_Boosting_Spike_Camera_CVPR_2024_paper.html)
Supplement: Supplementary file [file Zhao_Boosting_Spike_Camera_CVPR_2024_supplemental.pdf]

# Boosting Spike Camera Image Reconstruction from a Perspective of Dealing with Spike Fluctuations — Supplementary Materials —

Rui Zhao<sup>1,2</sup> Ruiqin Xiong<sup>1,2\*</sup> Jing Zhao<sup>1,2</sup> Jian Zhang<sup>3</sup> Xiaopeng Fan<sup>4</sup> Zhaofei Yu<sup>1</sup> Tiejun Huang<sup>1,2</sup>

<sup>1</sup>School of Computer Science, Peking University

<sup>2</sup>National Key Laboratory for Multimedia Information Processing, Peking University

<sup>3</sup>School of Electronic and Computer Engineering, Peking University

<sup>4</sup>School of Computer Science and Technology, Harbin Institute of Technology

ruizhao@stu.pku.edu.cn

{rqxiong, jzhaopku, zhangjian.sz, yuzf12, tjhuang}@pku.edu.cn fxp@hit.edu.cn

## 7. Proofs and Introductions

### 7.1. Proof of theorem 4.1

The following theorem and lemmas are based on the following assumption: There is no thermal noise and Poisson effect, and the input light intensity is constant. We refer to this assumption as “photons’ arrival is constant” for simplicity. The analyses in this subsection are *based on a single pixel*. The meanings of variables in this subsection are shown in Table 5.

| Variable                                                  | Meaning                                                                             |
|-----------------------------------------------------------|-------------------------------------------------------------------------------------|
| $T_r$                                                     | The time interval of spike reading.                                                 |
| $L$                                                       | The number of photons reaching a pixel area during a $T_r$ time interval.           |
| $\theta$                                                  | Accumulation threshold for spike firing in the spike camera.                        |
| $r$                                                       | Firing rate of spikes.                                                              |
| $\mathbf{A}_{\text{res}}$                                 | The residual accumulation at each spike-reading moment.                             |
| $\mathbf{S}$                                              | Binary spikes.                                                                      |
| $\mathbf{D}_{\text{SFT}}^{(1,1)}, D_{\text{SFT}}^{(1,1)}$ | (1,1)-order differential of spike firing time (vector and scalar).                  |
| $\mathbf{P}$                                              | The set of $\mathbf{D}_{\text{SFT}}^{(1,1)}$ only at moments that a spike is fired. |
| $A_{\text{rpf}}$                                          | The residual accumulation right after the last previous firing.                     |

Table 5. The meanings of main variables in Sec. 7.1.

**Lemma 7.1.** *Under the settings in Table 5 and the assumption that the photons’ arrival is constant. The expectation*

\*Corresponding author.

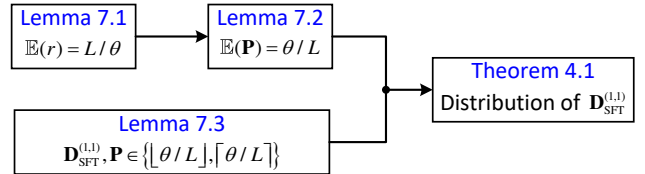

Figure 11. Proof pipeline of Theorem 4.1.

of the spike firing rate  $r$  is:

$$\mathbb{E}(r) = L/\theta. \quad (16)$$

*Proof.* Suppose the residual accumulation in the accumulator at each spike-reading moment, i.e., at the end of each integrate-and-fire cycle is  $\mathbf{A}_{\text{res}}(nT_r)$ . Since it has been noted in Sec. 3 that  $\theta > L$ ,  $\mathbf{A}_{\text{res}}$  of the pixel follows the following properties:

$$\mathbf{A}_{\text{res}}(nT_r) = \mathbf{A}_{\text{res}}((n-1)T_r) + L - \theta \mathbf{S}(nT_r), \quad (17)$$

where  $\mathbf{S}(nT_r)$  is 1 if there is a spike at time  $nT_r$  else it’s 0. The average spike firing rate over  $n$  spike-reading cycles can be obtained by summing the residual accumulation from  $T_r$  to  $nT_r$ :

$$\sum_{k=1}^n \mathbf{A}_{\text{res}}(kT_r) = \sum_{k=1}^n \mathbf{A}_{\text{res}}((k-1)T_r) + nL - \theta \sum_{k=1}^n \mathbf{S}(kT_r), \quad (18)$$

Move all the terms with  $\mathbf{A}_{\text{res}}$  to the left of the equal sign:

$$\sum_{k=1}^n \mathbf{A}_{\text{res}}(kT_r) - \sum_{k=1}^n \mathbf{A}_{\text{res}}((k-1)T_r) = nL - \theta \sum_{k=1}^n \mathbf{S}(kT_r), \quad (19)$$

$$\implies \mathbf{A}_{\text{res}}(nT_r) - \mathbf{A}_{\text{res}}(0) = nL - \theta \sum_{k=1}^n \mathbf{S}(kT_r). \quad (20)$$

Divide both sides of the Eq. (20) by  $n$ :

$$\frac{\mathbf{A}_{\text{res}}(nT_r) - \mathbf{A}_{\text{res}}(0)}{n} = L - \theta \frac{1}{n} \sum_{k=1}^n \mathbf{S}(kT_r). \quad (21)$$

Sort out the Eq. (21) and let  $n \rightarrow +\infty$ , we can obtain:

$$\begin{aligned} \mathbb{E}(r) &= \lim_{n \rightarrow +\infty} \frac{1}{n} \sum_{k=1}^n \mathbf{S}(kT_r) \\ &= \lim_{n \rightarrow +\infty} \frac{\mathbf{A}_{\text{res}}(nT_r) - \mathbf{A}_{\text{res}}(0)}{n\theta} + \frac{L}{\theta} = \frac{L}{\theta}. \end{aligned} \quad (22)$$

Finish proving Lemma 7.1.  $\square$

**Lemma 7.2.** Under the settings in Table 5 and the assumption that the photons' arrival is constant. Define  $\mathbf{P}$  is the set of (1,1)-order DSFT with spike firing at the corresponding moment:

$$\mathbf{P} = \left\{ \mathbf{D}_{\text{SFT}}^{(1,1)}(kT_r) \right\}_{k \in \{k \mid \mathbf{S}(kT_r)=1\}_{k=1}^n}.$$

There is:

$$\mathbb{E}(\mathbf{P}) = \theta/L. \quad (23)$$

*Proof.* Suppose the total time  $t_{\text{all}}$  is sufficiently large, it can be represented by either  $\mathbb{E}(r)$  or  $\mathbf{D}_{\text{SFT}}^{(1,1)}$ :

$$t_{\text{all}} = \sum_{k=1}^n \left( \mathbf{S}(kT_r) \cdot \mathbf{D}_{\text{SFT}}^{(1,1)}(kT_r) \right), \quad (24)$$

$$t_{\text{all}} = \left( \sum_{k=1}^n \mathbf{S}(kT_r) \right) / \mathbb{E}(r), \quad (25)$$

By considering the above two equations and Lemma 7.1, we can obtain:

$$\frac{\sum_{k=1}^n \left( \mathbf{S}(kT_r) \cdot \mathbf{D}_{\text{SFT}}^{(1,1)}(kT_r) \right)}{\sum_{k=1}^n \mathbf{S}(kT_r)} = \frac{1}{\mathbb{E}(r)} = \frac{\theta}{L}. \quad (26)$$

It is noted that the leftmost term of Eq. (26) seems like an expectation. But it's not the expectation of  $\{\mathbf{D}_{\text{SFT}}^{(1,1)}(kT_r)\}_{k=1}^n$  since the  $\{\mathbf{S}(kT_r)\}_{k=1}^n$  has masked a lot of values of the  $\mathbf{D}_{\text{SFT}}^{(1,1)}$ .

Define  $\mathbf{P}$  is the set of (1,1)-order DSFT with spike firing at the moment:

$$\mathbf{P} = \left\{ \mathbf{D}_{\text{SFT}}^{(1,1)}(kT_r) \right\}_{k \in \{k \mid \mathbf{S}(kT_r)=1\}_{k=1}^n}. \quad (27)$$

We can obtain:

$$\mathbb{E}(\mathbf{P}) = \frac{\sum_{k=1}^n \left( \mathbf{S}(kT_r) \cdot \mathbf{D}_{\text{SFT}}^{(1,1)}(kT_r) \right)}{\sum_{k=1}^n \mathbf{S}(kT_r)} = \frac{\theta}{L}. \quad (28)$$

Finish proving Lemma 7.2.  $\square$

**Lemma 7.3.** Under the settings in Table 5 and the assumption that the photons' arrival is constant. Suppose  $\theta \bmod L \neq 0$ . For one pixel at different moments, the  $\mathbf{D}_{\text{SFT}}^{(1,1)}$  and  $\mathbf{P}$  have only two values:  $\{\lfloor \theta/L \rfloor, \lceil \theta/L \rceil\}$ .

*Proof.* Suppose the residual accumulation right after the last previous firing is  $A_{\text{rpf}}$ , which contributes to the current spike firing. It's obvious that when  $A_{\text{rpf}} = 0$ , the current  $D_{\text{SFT}}^{(1,1)}$  is maximum since the previous integration does not help the accumulation of this time. Since  $\theta > L$  and  $\theta \bmod L \neq 0$ , the current (1,1)-order DSFT is  $\max(\mathbf{D}_{\text{SFT}}^{(1,1)}) = \lfloor \theta/L \rfloor + 1 = \lceil \theta/L \rceil$ .

When  $A_{\text{rpf}} \neq 0$ , i.e.,  $A_{\text{rpf}} > 0$ , suppose for *contradiction* that there are arbitrary two (1,1)-order DSFT satisfy:

$$(D_{\text{SFT}}^{(1,1)})_a - (D_{\text{SFT}}^{(1,1)})_b > 1. \quad (29)$$

Suppose  $A_{\text{all}}$  is the accumulation before reset when firing spike in this firing cycle, there is:

$$\begin{aligned} &(D_{\text{SFT}}^{(1,1)})_a \cdot L - (D_{\text{SFT}}^{(1,1)})_b \cdot L \\ &= ((A_{\text{all}})_a - (A_{\text{rpf}})_a) - ((A_{\text{all}})_b - (A_{\text{rpf}})_b) \\ &= (A_{\text{rpf}})_b - (A_{\text{rpf}})_a > L. \end{aligned} \quad (30)$$

Thus, there is  $(A_{\text{rpf}})_b > (A_{\text{rpf}})_a + L > L$ .

Suppose  $(D_{\text{SFT}}^{(1,1)})_{\text{last}}$  is the  $D_{\text{SFT}}^{(1,1)}$  of the last previous fired spike, it satisfies:

$$(D_{\text{SFT}}^{(1,1)})_{\text{last}} \cdot L \geq \theta, \quad (31)$$

$$((D_{\text{SFT}}^{(1,1)})_{\text{last}} - 1) \cdot L < \theta. \quad (32)$$

From Eq. (32) we can obtain that  $(D_{\text{SFT}}^{(1,1)})_{\text{last}} \cdot L < \theta + L$ . Furthermore, since  $A_{\text{rpf}} = (D_{\text{SFT}}^{(1,1)})_{\text{last}} \cdot L - \theta$ , so  $A_{\text{rpf}} < L$ .

In light of the erroneous assumption Eq. (29), the conclusion is *inconsistent* with the assumed objective fact  $A_{\text{rpf}} > L$ . Thus, there must exist a reality contrary to Eq. (29), i.e.,  $(D_{\text{SFT}}^{(1,1)})_a - (D_{\text{SFT}}^{(1,1)})_b \leq 1$ .

Since  $\mathbb{E}(\mathbf{P}) \neq \max(\mathbf{P}) = \max(\mathbf{D}_{\text{SFT}}^{(1,1)})$  and it can only take integers. Thus, there are:

$$\min(\mathbf{P}) = \min(\mathbf{D}_{\text{SFT}}^{(1,1)}) = \max(\mathbf{D}_{\text{SFT}}^{(1,1)}) - 1 = \lfloor L/\theta \rfloor \quad (33)$$

As a result,  $\mathbf{D}_{\text{SFT}}^{(1,1)}$  and  $\mathbf{P}$  have two values:  $\{\lfloor \theta/L \rfloor, \lceil \theta/L \rceil\}$ . Finish proving Lemma 7.3.  $\square$

**Theorem 4.1.** Under the settings in Table 5 and the assumption that the photons' arrival is constant. Suppose  $\theta \bmod L \neq 0$ . the (1,1)-order DSFT has only two values  $\{\lfloor \theta/L \rfloor, \lceil \theta/L \rceil\}$  and its distribution is as follows:

$$\begin{cases} \Pr \left\{ \mathbf{D}_{\text{SFT}}^{(1,1)} = \lfloor \theta/L \rfloor \right\} = p_1 = (\lceil \theta/L \rceil - \theta/L) \cdot \frac{\lfloor \theta/L \rfloor}{\theta/L} \\ \Pr \left\{ \mathbf{D}_{\text{SFT}}^{(1,1)} = \lceil \theta/L \rceil \right\} = p_2 = (\theta/L - \lfloor \theta/L \rfloor) \cdot \frac{\lceil \theta/L \rceil}{\theta/L} \end{cases}$$

where  $\Pr\{\cdot\}$  means probability.

*Proof.* Based on Lemma 4.1, since  $\mathbf{P}$  has only two values  $\{\lfloor\theta/L\rfloor, \lceil\theta/L\rceil\}$ , its distribution is as follows:

$$\begin{cases} \Pr\{\mathbf{P} = \lfloor\theta/L\rfloor\} = p_a \\ \Pr\{\mathbf{P} = \lceil\theta/L\rceil\} = p_b = 1 - p_a \end{cases} \quad (34)$$

According to the calculation formula of the expectation and Lemma 7.2, we can obtain:

$$\mathbb{E}(\mathbf{P}) = \lfloor\theta/L\rfloor \cdot p_a + \lceil\theta/L\rceil \cdot p_b, \quad (35)$$

and then we can solve:

$$\begin{cases} \Pr\{\mathbf{P} = \lfloor\theta/L\rfloor\} = p_a = \lceil\theta/L\rceil - \theta/L \\ \Pr\{\mathbf{P} = \lceil\theta/L\rceil\} = p_b = \theta/L - \lfloor\theta/L\rfloor \end{cases} \quad (36)$$

Consider the relationship between  $\mathbf{D}_{\text{SFT}}^{(1,1)}$  and  $\mathbf{P}$ .  $\mathbf{P}$  only includes the  $\mathbf{D}_{\text{SFT}}^{(1,1)}$  at moments that a spike is fired. But at moments without a spike, the  $\mathbf{D}_{\text{SFT}}^{(1,1)}$  still has the same value as the last spike firing moment. Thus, in  $\mathbf{D}_{\text{SFT}}^{(1,1)}$ ,  $\lfloor\theta/L\rfloor$  occurs  $\lfloor\theta/L\rfloor$  times as often as that in  $\mathbf{P}$ , and  $\lceil\theta/L\rceil$  occurs  $\lceil\theta/L\rceil$  times as often as that in  $\mathbf{P}$ . Thus, If we suppose the distribution of  $\mathbf{D}_{\text{SFT}}^{(1,1)}$  is:

$$\begin{cases} \Pr\{\mathbf{D}_{\text{SFT}}^{(1,1)} = \lfloor\theta/L\rfloor\} = p_1 \\ \Pr\{\mathbf{D}_{\text{SFT}}^{(1,1)} = \lceil\theta/L\rceil\} = p_2 \end{cases} \quad (37)$$

We can solve the  $p_1$  and  $p_2$  through:

$$p_1 = \frac{p_a \cdot \lfloor\theta/L\rfloor}{p_a \cdot \lfloor\theta/L\rfloor + p_b \cdot \lceil\theta/L\rceil}, \quad (38)$$

$$p_2 = \frac{p_b \cdot \lceil\theta/L\rceil}{p_a \cdot \lfloor\theta/L\rfloor + p_b \cdot \lceil\theta/L\rceil}. \quad (39)$$

Finally, we can obtain the distribution of  $\mathbf{D}_{\text{SFT}}^{(1,1)}$ :

$$\begin{cases} \Pr\{\mathbf{D}_{\text{SFT}}^{(1,1)} = \lfloor\theta/L\rfloor\} = p_1 = (\lceil\theta/L\rceil - \theta/L) \cdot \frac{\lfloor\theta/L\rfloor}{\theta/L} \\ \Pr\{\mathbf{D}_{\text{SFT}}^{(1,1)} = \lceil\theta/L\rceil\} = p_2 = (\theta/L - \lfloor\theta/L\rfloor) \cdot \frac{\lceil\theta/L\rceil}{\theta/L} \end{cases} \quad (40)$$

Finish proving Theorem 4.1.  $\square$

## 7.2. Introduction to harmonic mean inequality

**Harmonic mean inequality.** Suppose  $\{a_1, a_2, \dots, a_n\}$  is a set of positive numbers. There is:

$$\frac{1}{n} \sum_{k=1}^n a_k \geq n \left( \sum_{k=1}^n \frac{1}{a_k} \right)^{-1}, \quad (41)$$

where the equal sign is only achievable when  $a_1, a_2, \dots, a_n$  are completely equal.

It's a fundamental inequality that can be proved easily based on the convexity of the logarithmic function.

## 8. Additional Experimental Results and Details

### 8.1. Additional Details of Comparison Experiments

#### A. Parameters, running time, and costs.

As shown in Table 6, we compare the proposed BSF and other methods on the number of parameters, computational complexity (MACs), inference time, and GPU memory cost. The inference times are tested on an NVIDIA RTX 3090 GPU with inputs of  $256 \times 400$  resolution.

#### B. Details of quantitative evaluation.

As shown in Fig. 9 in the main paper, we use 12 scenes for comparison on data captured by spike cameras in the real world. Each scene has 400 frames of spikes. For each scene, we generate the 50th, 60th, ..., and 140th frames for quantitative comparison with non-reference image quality assessment metrics. For each scene of the REDS-SCIR, we use 110 spike frames and 4 image frames for training and evaluation. REDS-SCIR has 8640 and 360 scenes for training and evaluation, respectively. Thus, for training, it has 950.4 k spike frames and 34.56 k images. For evaluation, it has 39.6k spike frames and 1440 images.

#### C. Number of input frames of comparable methods.

We have compared SSML [1], Spk2ImgNet [5], and WGSE [4] in the experimental parts of the main paper with their original weights and weights retrained with the same settings as ours, respectively. These three methods are designed to use 41 frames of spikes as input, while our method is designed to use 61 frames of spikes as input. For a more rigorous comparison, we modify these three methods to use 61 as input and retrain the modified methods.

For SSML and WGSE, we directly modify the channel number of the input layer to 61. The original version of Spk2ImgNet segments the input 41 frames of spikes to  $5 \times 13$ -frame sub-streams with overlap. We modify Spk2ImgNet to use 61 frames of spikes to  $5 \times 21$ -frame sub-streams with overlap, and we modify the channel number of the input layer to 21, correspondingly.

The quantitative results of these three methods using 41 or 61 frames are shown in Table 7. In summary, for existing data-driven methods whose  $N_{\text{IF}}$  is modified to 61, the proposed BSF still maintains an advantage.

**D. Visual results on the SCIR-REDS dataset.** We supplement visual results on the REDS-SCIR dataset ( $\eta = 0.50$ ) in Fig. 13 and Fig. 14. For each method in these two figures, we show its reconstructed image and the error between the reconstructed image and its corresponding ground truth. The reconstructed images in the figures are normalized by the quantum factor  $\alpha$  and light intensity factor  $\eta$ :  $I_{\text{norm}} = I_{\text{pred}}/(\alpha \cdot \eta)$ . On the top right corner of the whole figure is the color bar used for the error maps.

| Part              | Method           | Params (M) | MACs (G) | Time (ms) | Memory (GB) | $\eta = 1.00$   |                 | $\eta = 0.75$   |                 | $\eta = 0.50$   |                 |
|-------------------|------------------|------------|----------|-----------|-------------|-----------------|-----------------|-----------------|-----------------|-----------------|-----------------|
|                   |                  |            |          |           |             | PSNR $\uparrow$ | SSIM $\uparrow$ | PSNR $\uparrow$ | SSIM $\uparrow$ | PSNR $\uparrow$ | SSIM $\uparrow$ |
| (B)               | FireNet [2] ♣    | 0.038      | 23.54    | 40.76     | 1.65        | 34.38           | 0.922           | 33.87           | 0.911           | 32.62           | 0.884           |
|                   | ETNet [3] ♣      | 22.179     | 338.48   | 243.40    | 1.87        | 33.24           | 0.918           | 32.85           | 0.909           | 31.96           | 0.889           |
| (C)               | SSML [1]         | 2.385      | 386.02   | 408.32    | 4.19        | 32.60           | 0.920           | 32.09           | 0.907           | 31.00           | 0.879           |
|                   | SSML [1] ♣       |            |          |           |             | 33.94           | 0.923           | 33.27           | 0.909           | 32.01           | 0.883           |
| (D)               | Spk2ImgNet [5]   | 3.904      | 1016.38  | 167.58    | 2.68        | 35.21           | 0.953           | 34.70           | 0.945           | 33.75           | 0.926           |
|                   | Spk2ImgNet [5] ♣ |            |          |           |             | <b>39.16</b>    | <b>0.966</b>    | <b>38.27</b>    | <b>0.958</b>    | 36.59           | <b>0.940</b>    |
|                   | WGSE [4]         | 3.806      | 425.22   | 88.65     | 4.78        | 35.21           | 0.950           | 34.98           | 0.947           | 34.11           | 0.931           |
|                   | WGSE [4] ♣       |            |          |           |             | 38.97           | 0.964           | 38.23           | 0.957           | <b>36.75</b>    | <b>0.940</b>    |
| <b>BSF (Ours)</b> |                  | 2.477      | 726.89   | 207.52    | 4.41        | <b>39.76</b>    | <b>0.970</b>    | <b>39.09</b>    | <b>0.964</b>    | <b>37.76</b>    | <b>0.951</b>    |

Table 6. The number of parameters, computational complexity, inference time, GPU memory cost, and quantitative performance on the SCIR-REDS dataset of our and other methods. ♣ means the network is retrained on REDS-SCIR with the *same settings* as ours

| Method            | $N_{IF}$ | $\eta = 1.00$   |                 |                    | $\eta = 0.75$   |                 |                    | $\eta = 0.50$   |                 |                    |
|-------------------|----------|-----------------|-----------------|--------------------|-----------------|-----------------|--------------------|-----------------|-----------------|--------------------|
|                   |          | PSNP $\uparrow$ | SSIM $\uparrow$ | LPIPS $\downarrow$ | PSNR $\uparrow$ | SSIM $\uparrow$ | LPIPS $\downarrow$ | PSNR $\uparrow$ | SSIM $\uparrow$ | LPIPS $\downarrow$ |
| SSML [1] ♣        | 41       | 33.94           | 0.923           | 0.075              | 33.27           | 0.909           | 0.088              | 32.01           | 0.883           | 0.116              |
|                   | 61       | 34.16           | 0.922           | 0.076              | 33.46           | 0.909           | 0.089              | 32.15           | 0.883           | 0.117              |
| Spk2ImgNet [5] ♣  | 41       | 39.16           | 0.966           | 0.024              | 38.27           | 0.958           | 0.032              | 36.59           | 0.940           | 0.051              |
|                   | 61       | 39.27           | 0.970           | 0.024              | 38.55           | 0.961           | 0.032              | 37.12           | 0.946           | 0.046              |
| WGSE [4] ♣        | 41       | 38.97           | 0.964           | 0.027              | 38.23           | 0.957           | 0.034              | 36.75           | 0.940           | 0.049              |
|                   | 61       | 38.91           | 0.963           | 0.027              | 38.17           | 0.956           | 0.034              | 36.76           | 0.940           | 0.049              |
| <b>BSF (Ours)</b> | 61       | 39.76           | 0.970           | 0.021              | 39.09           | 0.964           | 0.027              | 37.76           | 0.951           | 0.040              |

Table 7. Performance of data-driven spike camera image reconstruction methods whose number of input spike frames ( $N_{IF}$ ) is modified to 61 on REDS-SCIR dataset. ♣ means the network is retrained on REDS-SCIR with the *same settings* as ours

| MGA |     |      | $s_p$    | $k_p$ | PSNR $\uparrow$ |               |               |
|-----|-----|------|----------|-------|-----------------|---------------|---------------|
| Pym | DCN | CAPA |          |       | $\eta = 1.00$   | $\eta = 0.75$ | $\eta = 0.50$ |
| 3   | ✓   | ✗    | ✗        | ✗     | 39.380          | 38.768        | 37.533        |
| 3   | ✓   | ✓    | <u>3</u> | 3     | 39.759          | 39.088        | 37.764        |
| 3   | ✓   | ✓    | 5        | 3     | 39.704          | 39.041        | 37.714        |
| 3   | ✓   | ✓    | 7        | 3     | 39.693          | 39.030        | 37.714        |
| 3   | ✓   | ✓    | 9        | 3     | 39.700          | 39.037        | 37.721        |

Table 8. Ablation studies on the patchification size  $s_p$  of the cross-attentional patch-level alignment (CAPA) in multi-granularity alignment (MGA) module.

| MGA |     |      | $s_p$ | $k_p$    | PSNR $\uparrow$ |               |               |
|-----|-----|------|-------|----------|-----------------|---------------|---------------|
| Pym | DCN | CAPA |       |          | $\eta = 1.00$   | $\eta = 0.75$ | $\eta = 0.50$ |
| 3   | ✓   | ✗    | ✗     | ✗        | 39.380          | 38.768        | 37.533        |
| 3   | ✓   | ✓    | 3     | <u>3</u> | 39.759          | 39.088        | 37.764        |
| 3   | ✓   | ✓    | 3     | 5        | 39.712          | 39.047        | 37.726        |
| 3   | ✓   | ✓    | 3     | 7        | 39.731          | 39.069        | 37.749        |
| 3   | ✓   | ✓    | 3     | 9        | 39.694          | 39.020        | 37.685        |

Table 9. Ablation studies on the local sampling size  $k_p$  of the cross-attentional patch-level alignment (CAPA) in multi-granularity alignment (MGA) module.

## 8.2. Additional Results of Ablation Studies

**A. Ablations on the patchification size  $s_p$  of CAPA.** In the cross-attentional patch-level alignment (CAPA) of the

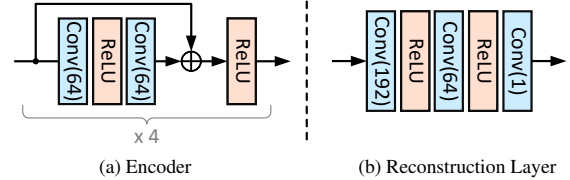

Figure 12. Illustration of the structure of (a) encoder and (b) reconstruction layer in our method. In parentheses is the number of the output channel.

multi-granularity alignment (MGA) module, features are first patched into patches at  $s_p \times s_p$  size without overlap. We implement ablation studies on the  $s_p$ . As shown in Table 8, when  $s_p$  is 3, CAPA achieves its maximum performance gain. When  $s_p$  is greater than 3, the performance gain decreases. Thus, the  $s_p = 3$  we choose is appropriate.

**B. Ablations on the local sampling size  $k_p$  of CAPA.** In the CAPA of the MGA module, the key features and value features are locally sampled with  $k_p \times k_p$  size to realize a local search strategy. We implement ablation studies on the  $k_p$ . As shown in Table 9, the performance of CAPA is insensitive to changes in  $k_p$ . Thus, we choose  $k_p = 3$  that has less computational cost.

## 8.3. Additional Details of Network Architecture

The detailed architecture of the encoder and reconstructive layer in the proposed method are shown in (a) and (b) of

Fig. 12, respectively. The Encoder consists of 4 layers of residual blocks, which are used for embedding the spike representation. The reconstruction we use is similar to that in Spk2ImgNet [5].

## 9. Fast Algorithm for DSFT

For spike representation, we propose to use multi-order DSFT to reduce the influence of multiple factors that make spikes fluctuate. For the computing of (1,1)-order and higher-order DSFT, we design two fast algorithms with  $\mathcal{O}(T)$  complexity, respectively, where  $T$  is the spikes' temporal length. We show these two algorithms in a pseudo-code-like manner. Algo. 1 is designed for computing (1,1)-order DSFT, and Algo. 2 is designed for higher-order DSFT.

## References

- [1] Shiyang Chen, Chaoteng Duan, Zhaofei Yu, Ruiqin Xiong, and Tiejun Huang. Self-supervised mutual learning for dynamic scene reconstruction of spiking camera. In *IJCAI*, pages 2859–2866, 2022. 3, 4
- [2] Cedric Scheerlinck, Henri Rebecq, Daniel Gehrig, Nick Barnes, Robert Mahony, and Davide Scaramuzza. Fast image reconstruction with an event camera. In *WACV*, pages 156–163, 2020. 4
- [3] Wenming Weng, Yueyi Zhang, and Zhiwei Xiong. Event-based video reconstruction using transformer. In *ICCV*, pages 2563–2572, 2021. 4
- [4] Jiyuan Zhang, Shanshan Jia, Zhaofei Yu, and Tiejun Huang. Learning temporal-ordered representation for spike streams based on discrete wavelet transforms. In *AAAI*, pages 137–147, 2023. 3, 4
- [5] Jing Zhao, Ruiqin Xiong, Hangfan Liu, Jian Zhang, and Tiejun Huang. Spk2ImgNet: Learning to reconstruct dynamic scene from continuous spike stream. In *CVPR*, pages 11996–12005, 2021. 3, 4, 5



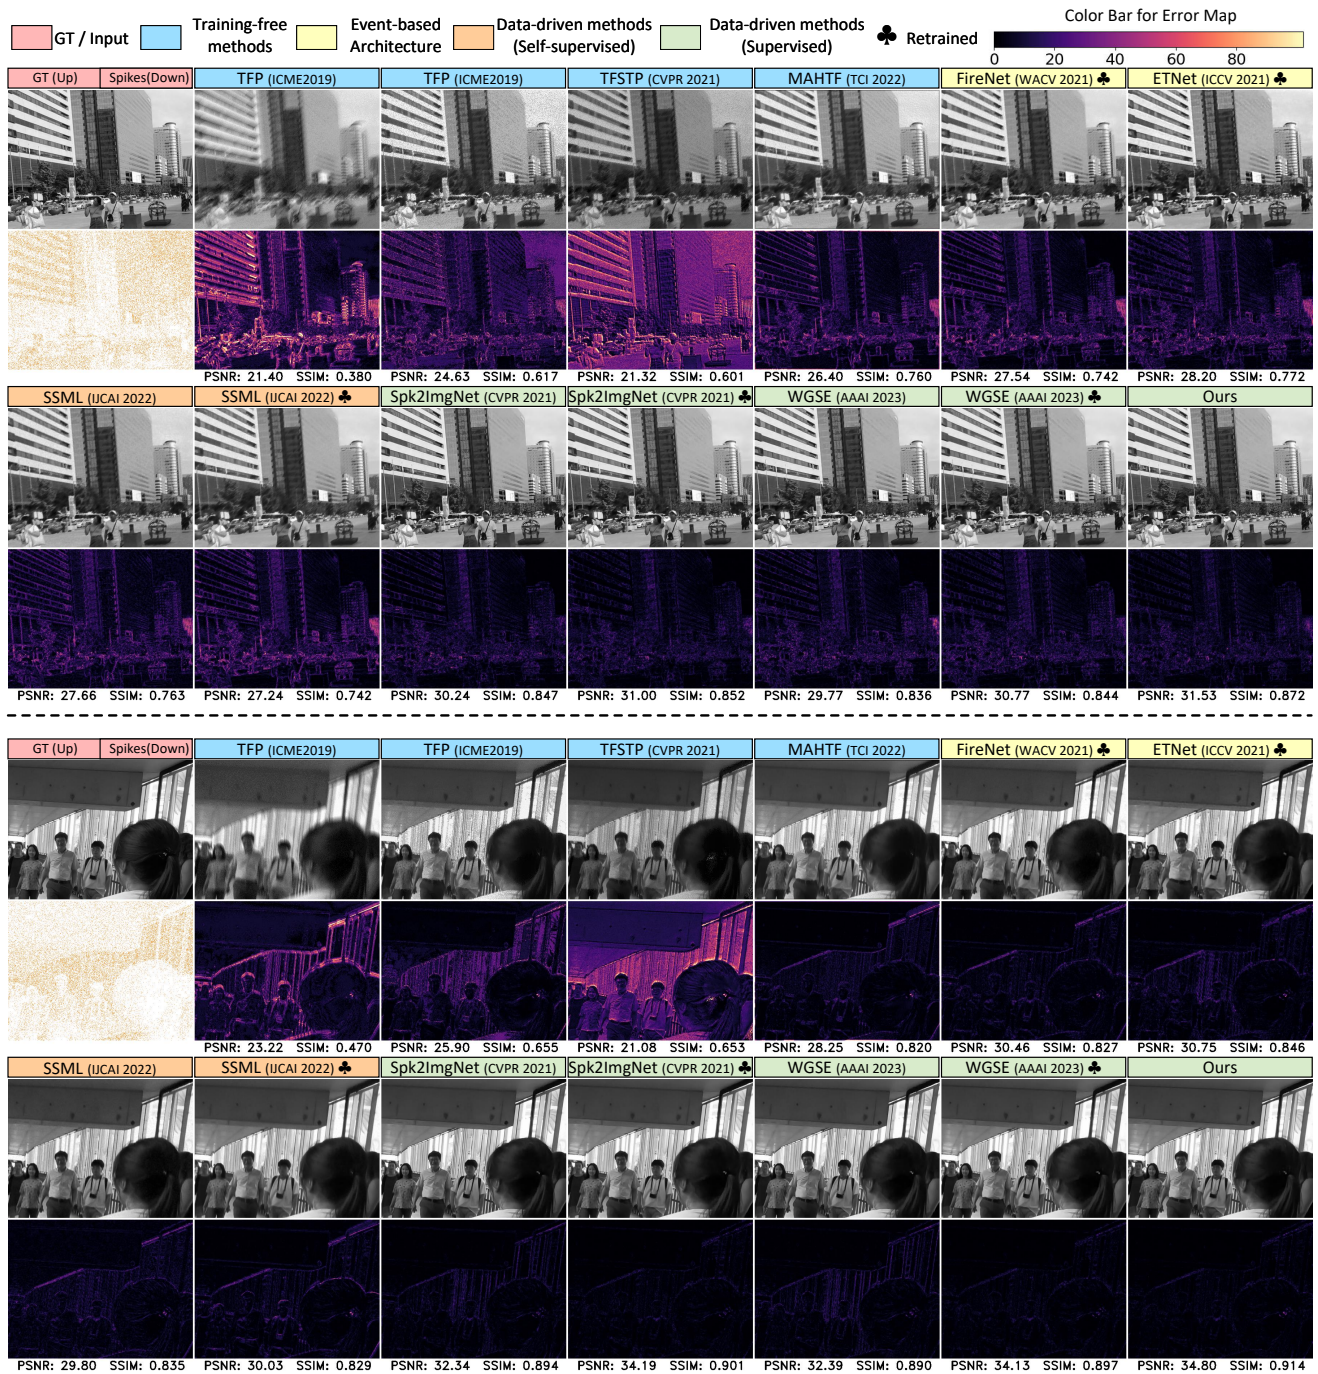

Figure 13. Visual comparison on the REDS-SCIR dataset. In the visualization of spikes, an orange point means a spike. In the visualization of each method, on the top is the reconstructed image, and on the bottom is the error map between the reconstructed image and its ground truth. On the top right corner of the whole figure is the color bar used for error maps. Please zoom in for more details.



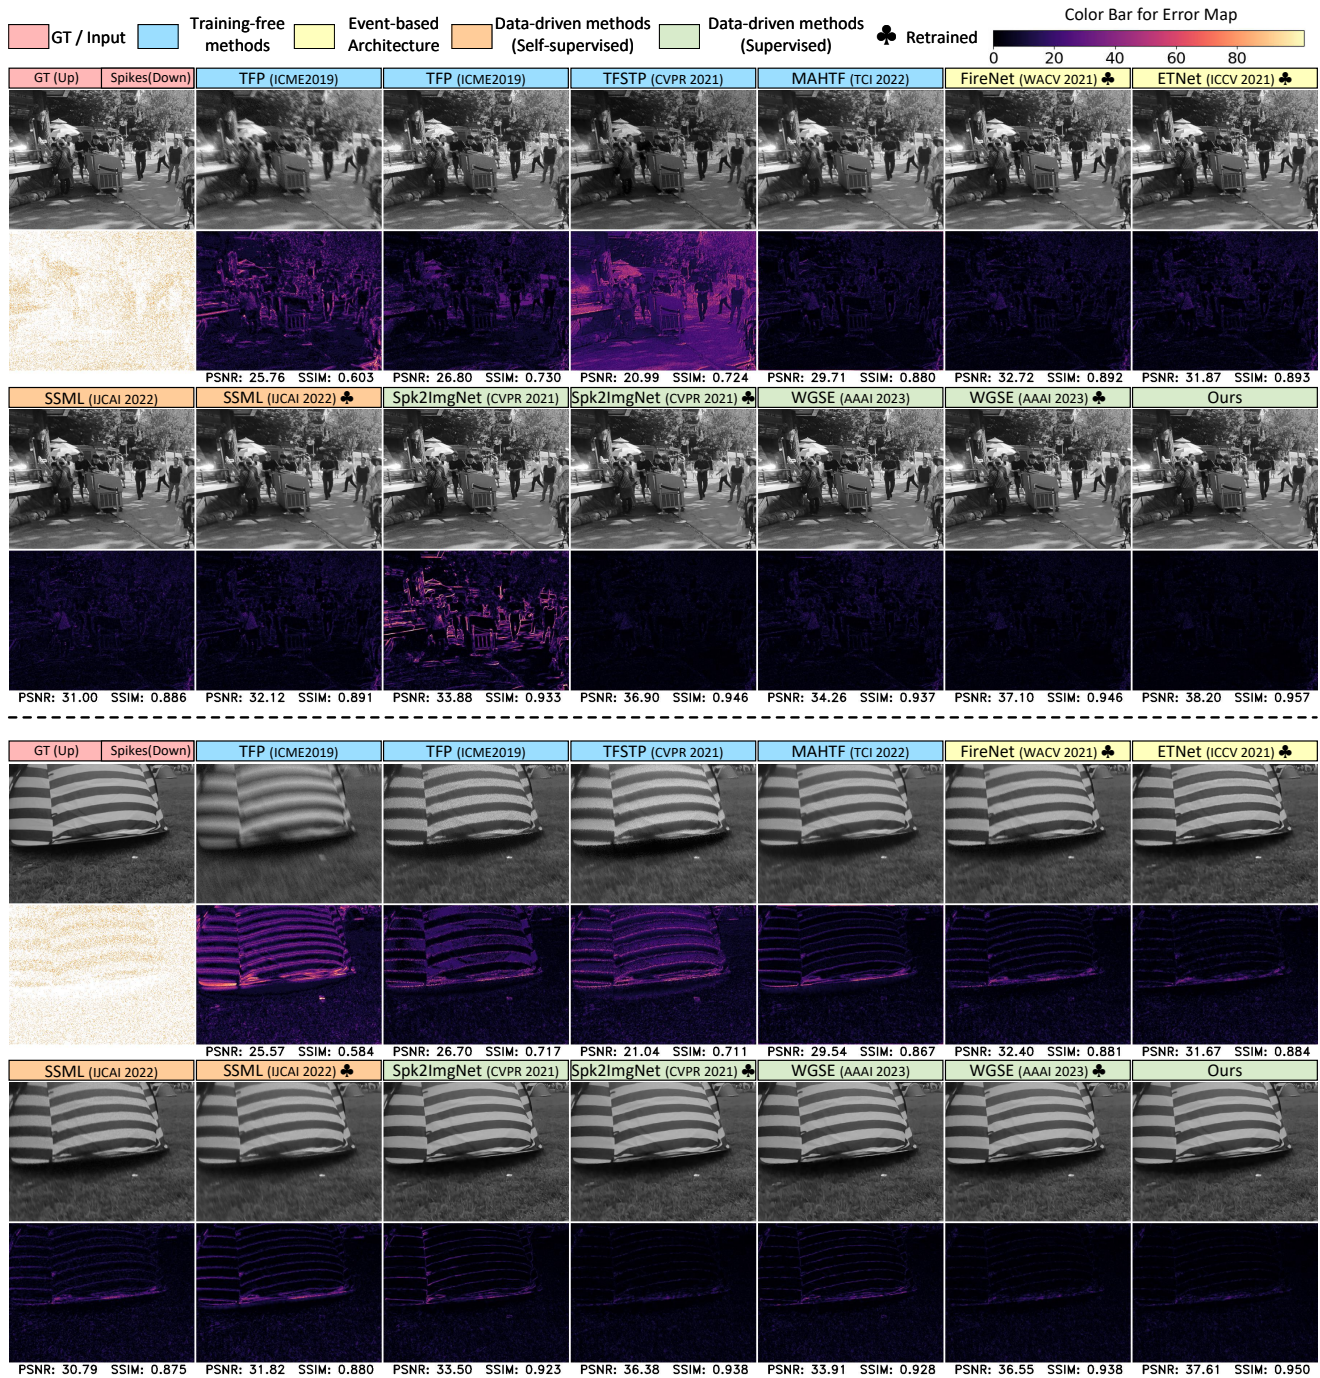

Figure 14. Visual comparison on the REDS-SCIR dataset. In the visualization of spikes, an orange point means a spike. In the visualization of each method, on the top is the reconstructed image, and on the bottom is the error map between the reconstructed image and its ground truth. On the top right corner of the whole figure is the color bar used for error maps. Please zoom in for more details.

---

**Algorithm 1**  $\mathcal{O}(T)$  algorithm for (1,1)-order differential of spike firing time (DSFT)  $\mathbf{D}_{\text{SFT}}^{(1,1)}$ 

---

**Input:**

The input spike streams  $\mathbf{S} \in \mathbb{B}^{T \times H \times W}$ .

**Output:**

(1,1)-order DSFT  $\mathbf{D}_{\text{SFT}}^{(1,1)}$ .

```
1: Allocate three matrices pre_idx, cur_idx,  $\mathbf{D}_{\text{SFT}}^{(1,1)}$  with  $T \times H \times W$  size and assign  $-1$  to all of their elements;
2: for  $i$  in  $1, \dots, T$  do do
3:   if  $i > 1$  then
4:     pre_idx[ $i, :, :$ ] = cur_idx[ $i - 1, :, :$ ];
5:     cur_idx[ $i, :, :$ ] = cur_idx[ $i - 1, :, :$ ];
6:   end if
7:   cur_idx[ $i, \mathbf{S}[i, :, :] == 1$ ] =  $i$ ;
8: end for
9: diff = cur_idx - pre_idx;
10: for  $i$  in  $T, \dots, 1$  do do
11:    $\mathbf{D}_{\text{SFT}}^{(1,1)}[i, \text{diff}[i, :, :] \neq 0] = \text{diff}[i, \text{diff}[i, :, :] \neq 0]$ ;
12:   if  $i < T - 1$  then
13:      $\mathbf{D}_{\text{SFT}}^{(1,1)}[i, \text{diff}[i, :, :] == 0] = \mathbf{D}_{\text{SFT}}^{(1,1)}[i + 1, \text{diff}[i, :, :] == 0]$ ;
14:   end if
15: end for
16: return  $\mathbf{D}_{\text{SFT}}^{(1,1)}$ ;
```

---

---

**Algorithm 2**  $\mathcal{O}(T)$  algorithm for higher order differential of spike firing time (DSFT)  $\mathbf{D}_{\text{SFT}}^{(n_1, n_2)}$ ,  $n_1 + n_2 > 2$ 

---

**Input:**

The input spike streams and (1,1)-order DSFT:  $\mathbf{S} \in \mathbb{B}^{T \times H \times W}$ ,  $\mathbf{D}_{\text{SFT}}^{(1,1)} \in \mathbb{Q}^{+, T \times H \times W}$ .

**Output:**

higher order DSFT  $\mathbf{D}_{\text{SFT}}^{(1,2)}$ ,  $\mathbf{D}_{\text{SFT}}^{(2,1)}$ ,  $\mathbf{D}_{\text{SFT}}^{(2,2)}$ .

```
1: Allocate a matrix flag with  $H \times W$  size and assign  $-2$  to all the elements;
2: Allocate two matrices dmls, dmrs with  $T \times H \times W$  size and assign  $-1$  to all the elements;
   /* dmls: dsft_mask_left_shift, which means the difference between increasing the current dsft to the
   left by one interval. dmrs: left -> right */
3: for  $i$  in  $T, \dots, 1$  do do
4:   flag = flag + ( $\mathbf{S}[i, :, :] == 1$ );
5:   cp_crd = (flag < 0); /* cp_crd: copy_pad_coordinates */
6:   dmls[ $i, \text{cp\_crd} == 1$ ] =  $\mathbf{D}_{\text{SFT}}^{(1,1)}[i, \text{cp\_crd} == 1]$ ;
7:   if  $i < T - 1$  then
8:     up_crd = ( $\mathbf{S}[i, :, :] == 1$ ) * (1 - cp_crd); /* up_crd: update_coordinates */
9:     dmls[ $i, \text{up\_crd} == 1$ ] =  $\mathbf{D}_{\text{SFT}}^{(1,1)}[i, \text{up\_crd} == 1]$ ;
10:    non_up_crd = ( $\mathbf{S}[i, :, :] \neq 1$ ) * (1 - cp_crd); /* non_up_crd: non_update_coordinates */
11:    dmrs[ $i, \text{non\_up\_crd} == 1$ ] = dmls[ $i + 1, \text{up\_crd} == 1$ ];
12:  end if
13: end for
14: Assign -2 to all the elements of flag;
15: for  $i$  in  $1, \dots, T$  do do
16:   flag = flag + ( $\mathbf{S}[i, :, :] == 1$ );
17:   cp_crd = (flag < 0);
18:   dmrs[ $i, \text{cp\_crd} == 1$ ] =  $\mathbf{D}_{\text{SFT}}^{(1,1)}[i, \text{cp\_crd} == 1]$ ;
19:   if  $i > 1$  then
20:     up_crd = ( $\mathbf{S}[i - 1, :, :] == 1$ ) * (1 - cp_crd);
21:     dmrs[ $i, \text{up\_crd}$ ] =  $\mathbf{D}_{\text{SFT}}^{(1,1)}[i, \text{up\_crd} == 1]$ ;
22:     non_up_crd = ( $\mathbf{S}[i - 1, :, :] \neq 1$ ) * (1 - cp_crd);
23:     dmrs[ $i, \text{non\_up\_crd} == 1$ ] = dmrs[ $i - 1, \text{up\_crd} == 1$ ];
24:   end if
25: end for
26:  $\mathbf{D}_{\text{SFT}}^{(1,2)} = \mathbf{D}_{\text{SFT}}^{(1,1)} + \text{dmls}$ ;
27:  $\mathbf{D}_{\text{SFT}}^{(2,1)} = \mathbf{D}_{\text{SFT}}^{(1,1)} + \text{dmrs}$ ;
28:  $\mathbf{D}_{\text{SFT}}^{(2,2)} = \mathbf{D}_{\text{SFT}}^{(1,1)} + \text{dmls} + \text{dmrs}$ ;
29: return  $\mathbf{D}_{\text{SFT}}^{(1,2)}$ ,  $\mathbf{D}_{\text{SFT}}^{(2,1)}$ ,  $\mathbf{D}_{\text{SFT}}^{(2,2)}$ ;
```

---
